# Supplementary material
Source: PubMed Central journal article supplement (PMC9588168)
Supplement: jama-e2219061-s001.pdf [file jama-e2219061-s001.pdf]

## Supplemental Online Content

Johnston C, Magaret A, Son H, et al. Viral Shedding 1 Year Following First-Episode Genital HSV-1 Infection. *JAMA*. Published online October 22, 2022.  
doi:10.1001/jama.2022.19061

eFigures  
eTables  
eMethods

This supplemental material has been provided by the authors to give readers additional information about their work.

**eFigure 1:** Participant Flow.

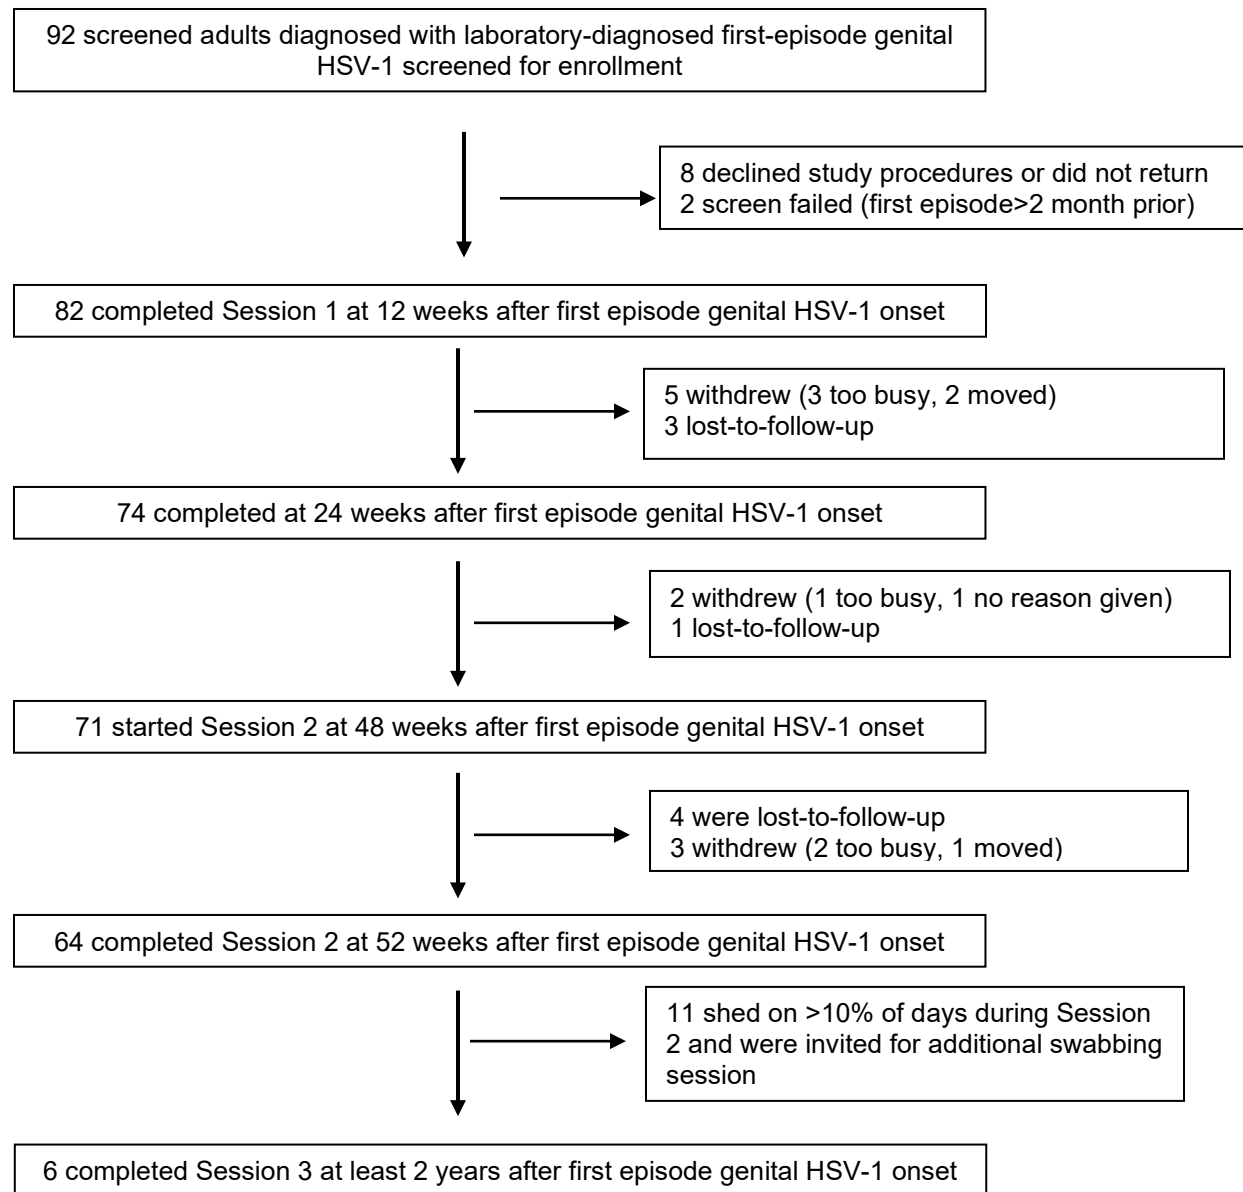

**eFigure 2.** Genital HSV-1 genomes are distributed among the previously known genetic diversity of HSV-1 genomes. Most previously sequenced HSV-1 genomes were derived from non-genital sources, including herpes labialis (oral), eczema herpeticum (skin), and herpes keratitis (ocular). The network graph of genital HSV-1 genomes from the present study (n=27) are shown in red, with the remaining strains from GenBank in black. Closely paired genomes (v44-v45, v42-v43) were collected from transmission pairs, as previously described<sup>1</sup> SplitsTree (version 4.14.5) was used to create the network graph. See Supplemental Table 1 & 2 for a list of GenBank Accessions for the new and prior genomes.

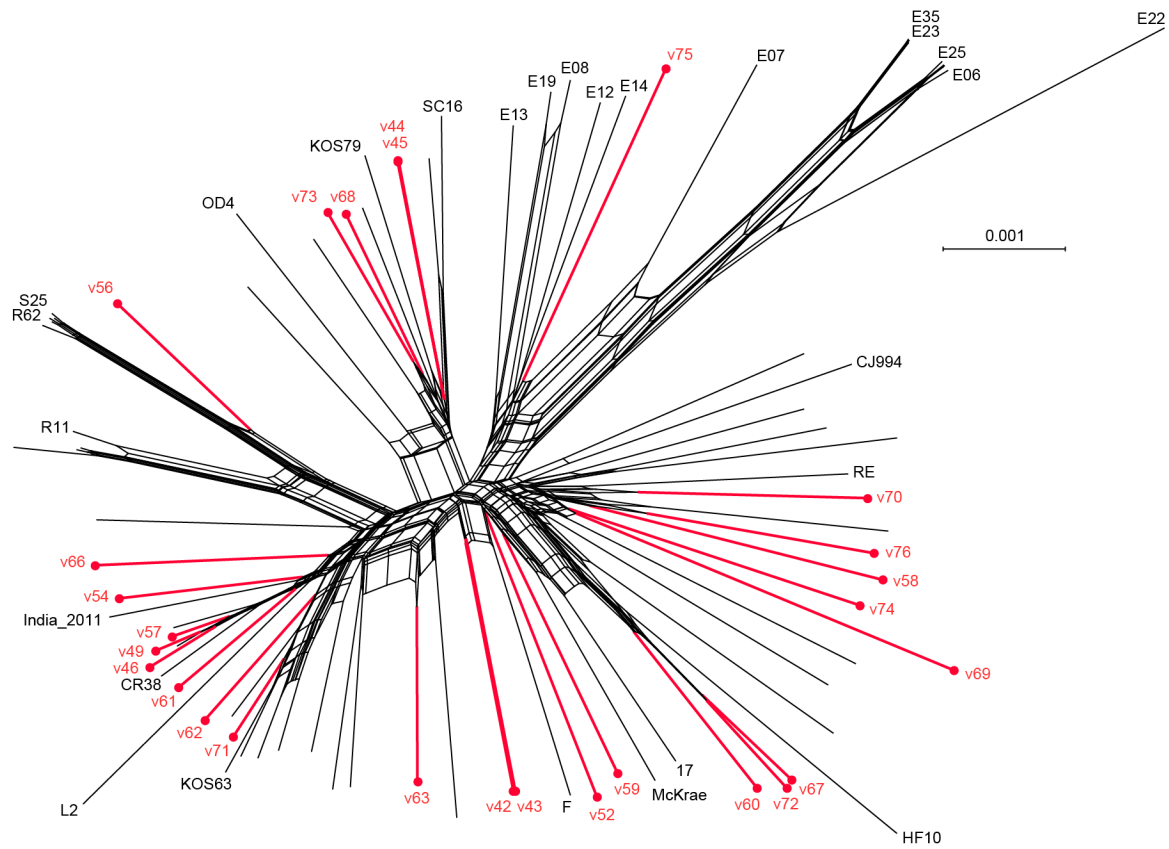

**eFigure 3.** Representative time course in two participants with primary genital HSV-1 with high (A) and low (B) proportion of HSV-1 specific CD4 T cells in PBMC. Expression of IFN- $\gamma$ , IL-2, TNF- $\alpha$  and CD40L was tested. Bar colors reflect the sum of possible combinations of net rates for two or three effector molecules of the abundance of CD4 T cells with all 4 responses.

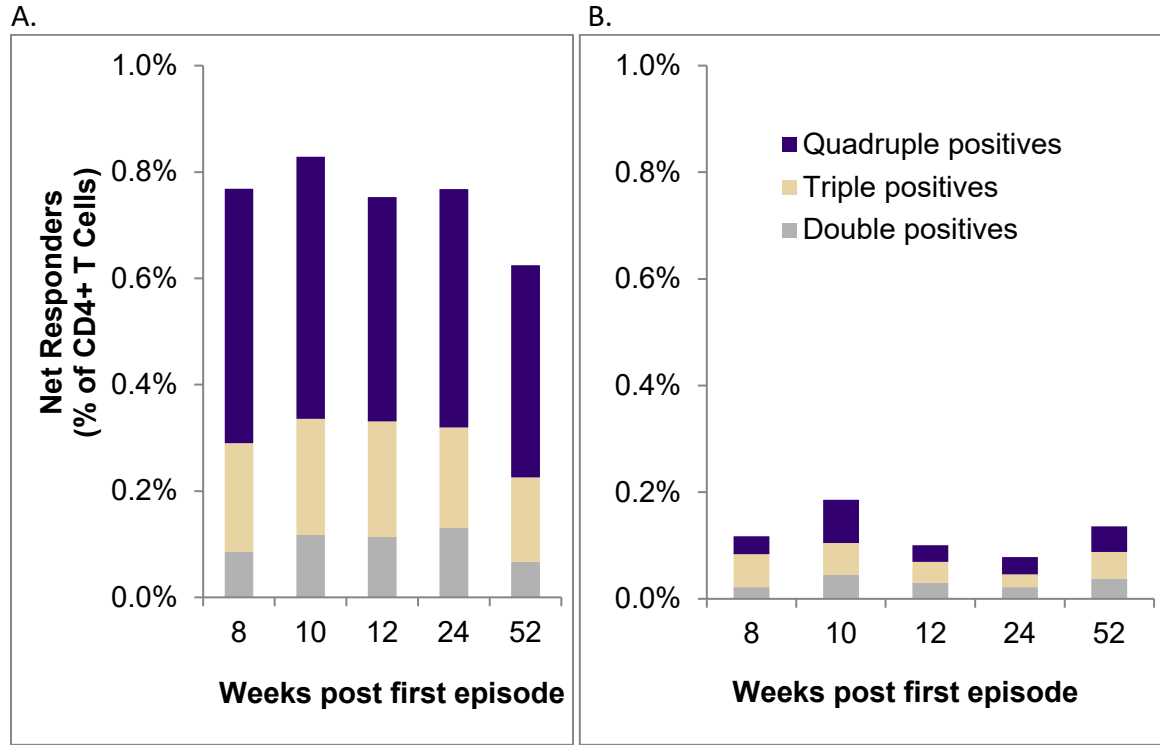

**eFigure 4.** Representative ELISPOT data from an HLA-A\*02:01/HLA-B\*07:02 participant in the current study documenting reactivity with peptide pools and individual HSV-1 peptide epitopes. PBMC from representative participant with primary genital HSV-1 infection) were tested in IFN- $\gamma$  ELISPOT with pooled or single known HSV-1 CD8 T cell peptides at 1  $\mu$ g/ml concentration. Identity of reactive peptides is indicated. Reactivity to peptide pools 1 and 2, negative controls media and DMSO, and positive control PHA are shown at right.

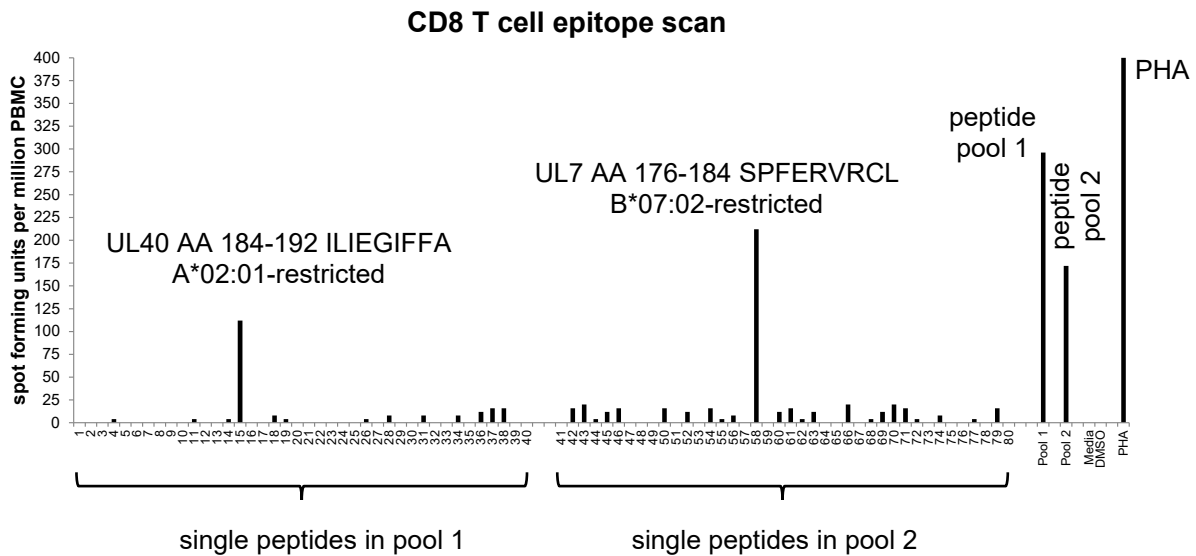

**eTable 1: 27 new genital HSV-1 genomes from viral cultures**

| <b>Viral genome ID</b> | <b>Full viral genome name</b> | <b>GenBank Accession</b> | <b>Culture at # days post-primary infection</b> | <b>Infection status at screening</b> |
|------------------------|-------------------------------|--------------------------|-------------------------------------------------|--------------------------------------|
| v42                    | v42_d338_cu_gen_les           | OP297869                 | 338                                             | Unable to determine                  |
| v43                    | v43_d17_cu_gen_les            | OP297878                 | 17                                              | Primary                              |
| v44                    | v44_d2_cu_gen_les             | OP297865                 | 2                                               | Non-primary                          |
| v45                    | v45_d4_cu_gen_les             | OP297881                 | 4                                               | Primary                              |
| v46                    | v46_d349_cu_gen_les           | OP297868                 | 349                                             | Primary                              |
| v49                    | v49_d257_cu_gen_les           | OP297875                 | 257                                             | Primary                              |
| v52                    | v52_d84_cu_gen_les            | OP297867                 | 84                                              | Primary                              |
| v54                    | v54_d71_cu_gen_les            | OP297873                 | 71                                              | Primary                              |
| v56                    | v56_d6_cu_gen_les             | OP297864                 | 6                                               | Primary                              |
| v57                    | v57_d3_cu_gen_les             | OP297884                 | 3                                               | Primary                              |
| v58                    | v58_d1_cu_gen_les             | OP297870                 | 1                                               | Non-primary                          |
| v59                    | v59_d121_cu_gen_les           | OP297876                 | 121                                             | Primary                              |
| v60                    | v60_d3_cu_gen_les             | OP297860                 | 3                                               | Primary                              |
| v61                    | v61_d2_cu_gen_les             | OP297863                 | 2                                               | Primary                              |
| v62                    | v62_d3_cu_gen_les             | OP297872                 | 3                                               | Primary                              |
| v63                    | v63_d284_cu_oral              | OP297879                 | 284                                             | Primary                              |
| v66                    | v66_d6_cu_gen                 | OP297877                 | 6                                               | Primary                              |
| v67                    | v67_d346_cu_gen_les           | OP297885                 | 346                                             | Primary                              |
| v68                    | v68_d8_cu_gen_les             | OP297880                 | 8                                               | Primary                              |
| v69                    | V69_d2_cu_gen_les             | OP297871                 | 2                                               | Unable to determine                  |
| v70                    | v70_d1_cu_gen_les             | OP297861                 | 1                                               | Primary                              |
| v71                    | v71_d395_cu_gen_les           | OP297866                 | 395                                             | Primary                              |
| v72                    | v72_d53_cu_gen_les            | OP297886                 | 53                                              | Non-primary                          |
| v73                    | v73_d4_cu_gen_les             | OP297862                 | 4                                               | Primary                              |
| v74                    | v74_d193_cu_gen               | OP297874                 | 193                                             | Primary                              |
| v75                    | v75_d23_cu_gen_les            | OP297883                 | 23                                              | Non-primary                          |
| v76                    | v76_d266_cu_gen_les           | OP297882                 | 266                                             | Primary                              |

**eTable 2: HSV-1 genomes used for network graph analysis**

| <b>Virus Isolate</b> | <b>Country (with location detail, if available)</b> | <b>GenBank Accession #</b> | <b>References</b> |
|----------------------|-----------------------------------------------------|----------------------------|-------------------|
| H1211_F-11           | Finland                                             | MH999843                   | 2,3               |
| H1215_M-15           | Finland                                             | MH999846                   | 2,3               |
| H12113_F-13          | Finland                                             | MH999842                   | 3                 |
| H12114_F-14g         | Finland                                             | MH999844                   | 2,3               |
| H12117_F-17          | Finland                                             | MH999845                   | 2,3               |
| H12118_F-18g         | Finland                                             | MH999847                   | 2,3               |
| H1311_F11/           | Finland                                             | MH999848                   | 3                 |
| H1312_M-12           | Finland                                             | MH999849                   | 3                 |
| H1412_F-12g          | Finland                                             | MH999851                   | 3                 |
| H15119_M-19          | Finland                                             | MH999850                   | 3                 |
| SC16                 | Spain (Madrid)                                      | KX946970                   | 4                 |
| 172_2010             | Jena, Germany                                       | LT594105                   | 5                 |
| 2158_2007            | Jena, Germany                                       | LT594106                   | 5                 |

|                          |                            |          |     |
|--------------------------|----------------------------|----------|-----|
| 3083_2008                | Jena, Germany              | LT594107 | 5   |
| 1319_2005                | Germany                    | LT594108 | 5   |
| 270_2007                 | Manebach, Germany          | LT594109 | 5   |
| 66_2007                  | Jena, Germany              | LT594110 | 5   |
| 1394_2005                | Germany                    | LT594111 | 5   |
| 369_2007                 | Jena, Germany              | LT594112 | 5   |
| 160_1982                 | Erfurt, Germany            | LT594192 | 5   |
| 132_1998                 | Gelsenkirchen, Germany     | LT594457 | 5   |
| L2                       | Russia (Moscow)            | KT780616 | 6   |
| H193                     | U.S.A.                     | KT425108 | 7   |
| KOS63                    | U.S.A. (Houston, TX)       | KT425110 | 8   |
| KOS79                    | U.S.A. (Madison, WI)       | KT425109 | 8   |
| CJ994                    | U.S.A. (Madison, WI)       | KR011283 | 9   |
| HSV-1/0116209/India/2011 | India                      | KJ847330 | 10  |
| H166                     | U.S.A.                     | KM222726 | 11  |
| H166syn                  | U.S.A.                     | KM222727 | 11  |
| RE                       | New Orleans, U.S.A.        | KF498959 | n/a |
| OD4                      | U.S.A. (Madison, WI)       | JN420342 | 12  |
| 17                       | U.K. (Glasgow)             | JN555585 | 13  |
| CR38                     | China (Shenyang)           | HM585508 | 13  |
| E06                      | Kenya (Nairobi)            | HM585496 | 13  |
| E07                      | Kenya (Nairobi)            | HM585497 | 13  |
| E08                      | Kenya (Nairobi)            | HM585498 | 13  |
| E10                      | Kenya (Nairobi)            | HM585499 | 13  |
| E11                      | Kenya (Nairobi)            | HM585500 | 13  |
| E12                      | Kenya (Nairobi)            | HM585501 | 13  |
| E13                      | Kenya (Nairobi)            | HM585502 | 13  |
| E14                      | Kenya (Nairobi)            | HM585510 | 13  |
| E15                      | Kenya (Nairobi)            | HM585503 | 13  |
| E19                      | Kenya (Nairobi)            | HM585511 | 13  |
| E22                      | Kenya (Nairobi)            | HM585504 | 13  |
| E23                      | Kenya (Nairobi)            | HM585505 | 13  |
| E25                      | Kenya (Nairobi)            | HM585506 | 13  |
| E35                      | Kenya (Nairobi)            | HM585507 | 13  |
| R11                      | South Korea (Seoul)        | HM585514 | 13  |
| R62                      | South Korea (Seoul)        | HM585515 | 13  |
| S23                      | Japan (Sapporo)            | HM585512 | 13  |
| S25                      | Japan (Sapporo)            | HM585513 | 13  |
| F                        | U.S.A. (Chicago, IL)       | GU734771 | 14  |
| H129                     | U.S.A. (San Francisco, CA) | GU734772 | 14  |
| McKrae                   | U.S.A. (Gainesville, FL)   | JX142173 | 13  |
| HF10                     | U.S.A. (New York, NY)      | DQ889502 | 15  |
| Ty_25                    | Japan                      | MH999840 | n/a |
| Ty_148                   | Japan                      | MH999841 | n/a |
| K_86                     | Japan                      | MH999839 | n/a |
| K_47                     | Japan                      | MH999838 | n/a |

**eTable 3.** Demographic and clinical characteristics of people enrolled by acquisition type.

| <b>Baseline Characteristic</b>                                                     | <b>Non-primary<br/>(n=23)</b> | <b>Primary<br/>acquisition<br/>(N = 42)</b> | <b>Unknown<br/>acquisition<br/>(n=17)</b> |
|------------------------------------------------------------------------------------|-------------------------------|---------------------------------------------|-------------------------------------------|
| <b>Median age, years<br/>(range)</b>                                               | 25 (19, 57)                   | 26 (16, 64)                                 | 29 (19, 47)                               |
| <b>Sex, N (%)</b>                                                                  |                               |                                             |                                           |
| Female                                                                             | 13 (57%)                      | 31 (74%)                                    | 10 (59)                                   |
| Male                                                                               | 10 (43%)                      | 11 (26%)                                    | 7 (41%)                                   |
| <b>Race, N (%)</b>                                                                 |                               |                                             |                                           |
| White                                                                              | 19 (83%)                      | 36 (86%)                                    | 11 (65%)                                  |
| Black                                                                              | 0 (0%)                        | 0 (0%)                                      | 1 (6%)                                    |
| Asian                                                                              | 0 (0%)                        | 0 (0%)                                      | 2 (12%)                                   |
| Other                                                                              | 1 (4%)                        | 2 (5%)                                      | 0 (0%)                                    |
| Mix/multiple                                                                       | 3 (13%)                       | 4 (10%)                                     | 3 (18%)                                   |
| Median days since<br>genital HSV acquisition<br>at enrollment, if known<br>(range) | 58 (46, 70) [n=23]            | 58 (54, 95) [n=42]                          | 63 (57, 119)<br>[n=17]                    |
| Hx of oral HSV                                                                     | 5 (22%)                       | 3 (7%)                                      | 2 (12%)                                   |
| Median days since oral<br>HSV acquisition, if known<br>(range)                     | 765 (58, 5127)<br>[n=5]       | 3058 (54, 7538)<br>[n=4]                    | 2302 (71, 4532)<br>[n=2]                  |



**eTable 4.** Bivariable (B) and multivariable (M)<sup>a</sup> risk factors associated with genital lesions

| Effect                                     | Model-predicted Shedding rate (95% CI) | Regressions |                     |         |
|--------------------------------------------|----------------------------------------|-------------|---------------------|---------|
|                                            |                                        | Model       | Risk ratio (95% CI) | p-value |
| 1 <sup>st</sup> session                    | 0.007 (0.003, 0.015)                   | B           | Ref                 | --      |
| 2 <sup>nd</sup> session                    | 0.014 (0.007, 0.026)                   | B           | 1.96 (0.77 to 4.98) | 0.15    |
| Non-primary/unknown acquisitions           | 0.003 (0.001, 0.007)                   | B           | Ref                 | --      |
| Primary acquisitions                       | 0.021 (0.011, 0.038)                   | B           | 6.50 (2.37, 17.8)   | <0.001  |
| Female                                     | 0.012 (0.007, 0.022)                   | B           | Ref                 | --      |
| Male                                       | 0.006 (0.002, 0.016)                   | B           | 0.52 (0.17 to 1.61) | 0.25    |
| Age < 26                                   | 0.014 (0.007, 0.027)                   | B           | Ref                 | --      |
| Age ≥ 26                                   | 0.007 (0.003, 0.015)                   | B           | 0.50 (0.18, 1.39)   | 0.18    |
| 1 <sup>st</sup> session among non-primary  | 0.002 (0.001, 0.006)                   | M           | Ref                 | --      |
| 2 <sup>nd</sup> session among non-primary  | 0.004 (0.015, 0.012)                   | M           | 1.83 (0.57 to 5.86) | 0.30    |
| 1 <sup>st</sup> session among primary      | 0.015 (0.006, 0.035)                   | M           | Ref                 | --      |
| 2 <sup>nd</sup> session among primary      | 0.028 (0.014, 0.060)                   | M           | 1.95 (0.71 to 5.37) | 0.19    |
| Non-primary during 1 <sup>st</sup> session | 0.002 (0.001, 0.006)                   | M           | Ref                 | --      |
| Primary during 1 <sup>st</sup> session     | 0.015 (0.006, 0.035)                   | M           | 6.21 (1.72 to 22.4) | 0.006   |

<sup>a</sup> For this analysis, those with unknown acquisition type are grouped with non-primaries. For the comparison between first and second session, the model does not distinguish primary from non-primary or unknown acquisition type. For the comparison between non-primary unknown and primary the model does not distinguish 1<sup>st</sup> session from 2<sup>nd</sup> session. The **multivariable model** included an interaction term between session and acquisition type. In **multivariable models** including both age and gender, neither age nor gender contributed to the model in estimating shedding frequencies, so those measures were removed in backward elimination

**eTable 5.** Bivariable (B) and multivariable (M) risk factors associated with genital and oral HSV-1 shedding among 70 people who did not receive suppressive antiviral therapy between Session 1 and Session 2. For this analysis, those with unknown acquisition type are grouped with non-primaries. For the comparison between first and second session, the model does not distinguish primary from non-primary or unknown acquisition type. For the comparison between non-primary unknown and primary the model does not distinguish 1<sup>st</sup> session from 2<sup>nd</sup> session. The multivariable model included an interaction term between session and acquisition type. In multivariable models including both age and gender, neither age nor gender contributed to the model in estimating shedding frequencies, so those measures were removed in backward elimination.

| <b>Genital Shedding</b>               |                                               |                    |                            |                |
|---------------------------------------|-----------------------------------------------|--------------------|----------------------------|----------------|
| <b>Effect</b>                         | <b>Model-predicted Shedding rate (95% CI)</b> | <b>Regressions</b> |                            |                |
|                                       |                                               | <b>Model</b>       | <b>Risk ratio (95% CI)</b> | <b>p-value</b> |
| 1 <sup>st</sup> session               | 0.054 (0.036, 0.083)                          | B                  | Ref                        | --             |
| 2 <sup>nd</sup> session               | 0.028 (0.014, 0.054)                          | B                  | 0.52 (0.26, 1.01)          | 0.05           |
| Non-1° acquisitions                   | 0.025 (0.014, 0.045)                          | B                  | Ref                        | --             |
| 1° acquisitions                       | 0.079 (0.049, 0.126)                          | B                  | 3.14 (1.47, 6.73)          | 0.004          |
| Female                                | 0.053 (0.034, 0.084)                          | B                  | Ref                        | --             |
| Male                                  | 0.030 (0.014, 0.063)                          | B                  | 0.57 (0.24, 1.35)          | 0.19           |
| Age < 26                              | 0.060 (0.035, 0.100)                          | B                  | Ref                        | --             |
| Age ≥ 26                              | 0.032 (0.018, 0.057)                          | B                  | 0.54 (0.25, 1.17)          | 0.12           |
| 1 <sup>st</sup> session among non-1°  | 0.031 (0.016, 0.058)                          | M                  | Ref                        | --             |
| 2 <sup>nd</sup> session among non-1°  | 0.016 (0.006, 0.043)                          | M                  | 0.53 (0.20, 1.41)          | 0.20           |
| 1 <sup>st</sup> session among 1°      | 0.010 (0.060, 0.166)                          | M                  | Ref                        | --             |
| 2 <sup>nd</sup> session among 1°      | 0.051 (0.022, 0.118)                          | M                  | 0.51 (0.21, 1.23)          | 0.13           |
| non-1° during 1 <sup>st</sup> session | 0.031 (0.016, 0.058)                          | M                  | Ref                        | --             |
| 1° during 1 <sup>st</sup> session     | 0.100 (0.060, 0.166)                          | M                  | 3.25 (1.44, 7.35)          | 0.005          |
| <b>Oral Shedding</b>                  |                                               |                    |                            |                |

|                                      |                      |   |                   |       |
|--------------------------------------|----------------------|---|-------------------|-------|
| 1 <sup>st</sup> session              | 0.015 (0.008, 0.027) | B | Ref               | --    |
| 2 <sup>nd</sup> session              | 0.016 (0.008, 0.031) | B | 1.08 (0.50, 2.37) | 0.83  |
| Non-1° acquisitions                  | 0.008 (0.004, 0.016) | B | Ref               | --    |
| 1° acquisitions                      | 0.029 (0.015, 0.055) | B | 3.53 (1.41, 8.81) | 0.008 |
| Female                               | 0.015 (0.009, 0.026) | B | Ref               | --    |
| Male                                 | 0.016 (0.006, 0.039) | B | 1.06 (0.37, 3.04) | 0.91  |
| Age < 26                             | 0.021 (0.012, 0.037) | B | Ref               | --    |
| Age ≥ 26                             | 0.011 (0.005, 0.024) | B | 0.51 (0.19, 1.37) | 0.18  |
| 1 <sup>st</sup> session among non-1° | 0.007 (0.003, 0.017) | M | Ref               | --    |
| 2 <sup>nd</sup> session among non-1° | 0.009 (0.003, 0.031) | M | 1.29 (0.26, 6.40) | 0.75  |

|                                       |                      |   |                    |       |
|---------------------------------------|----------------------|---|--------------------|-------|
| 1 <sup>st</sup> session among 1°      | 0.028 (0.013, 0.060) | M | Ref                | --    |
| 2 <sup>nd</sup> session among 1°      | 0.029 (0.013, 0.065) | M | 1.04 (0.44, 2.47)  | 0.93  |
| non-1° during 1 <sup>st</sup> session | 0.007 (0.003, 0.017) | M | Ref                | --    |
| 1° during 1 <sup>st</sup> session     | 0.028 (0.013, 0.060) | M | 3.87 (1.22, 12.25) | 0.022 |

| <b>eTable 6. Association between shedding rates and polyfunctional cytokine expression</b> |         |                         |                      |                 |                 |
|--------------------------------------------------------------------------------------------|---------|-------------------------|----------------------|-----------------|-----------------|
| <b>Spearman correlations</b><br>(two-sided p-value)                                        |         |                         | % Cytokine expressed |                 |                 |
|                                                                                            |         |                         | At least 2           | At least 3      | 4               |
| Shedding rates                                                                             | Genital | 1 <sup>st</sup> session | -0.09<br>(0.68)      | -0.12<br>(0.61) | -0.11<br>(0.61) |
|                                                                                            |         | 2 <sup>nd</sup> session | 0.46<br>(0.06)       | 0.29<br>(0.25)  | 0.25<br>(0.31)  |
|                                                                                            | Oral    | 1 <sup>st</sup> session | 0.07<br>(0.76)       | 0.06<br>(0.77)  | 0.12<br>(0.58)  |
|                                                                                            |         | 2 <sup>nd</sup> session | 0.32<br>(0.20)       | 0.34<br>(0.17)  | 0.36<br>(0.15)  |

**eTable 7. HSV-1 peptides found to be immunogenic in IFN- $\gamma$  ELISPOT in one or more subjects in this study.**

| <b>peptide<br/>(HSV-1 open reading<br/>frame_ amino acids)</b> | <b>sequence</b> | <b>HLA restricting allele</b> |
|----------------------------------------------------------------|-----------------|-------------------------------|
| UL40_184-192                                                   | ILIEGIFFA       | A*02:01                       |
| UL48_479-488                                                   | FTDALGIDEY      | A*01:01                       |
| UL49_281-290                                                   | RPTERPRAPA      | B*07:02                       |
| UL27_17-25                                                     | ALLGLTLGV       | A*02:01                       |
| UL27_561-569                                                   | RMLGDVMAV       | A*02:01                       |
| UL46_702-710                                                   | ALSALLTKL       | A*02:01                       |
| UL46_226-234                                                   | AYVSVLYRW       | A*24:02                       |
| RL2_698-706                                                    | VPGWSRRTL       | B*07:02                       |
| UL7_176-184                                                    | SPFERVRCL       | B*07:02                       |
| UL47_286-294                                                   | FLADAVVRL       | A*02:01                       |
| UL47_544-552                                                   | RLLGFADTV       | A*02:01                       |
| UL48_90-99                                                     | SALPTNADLY      | A*01:01                       |

## eMethods

### **Viral culture expansion, nucleocapsid DNA isolation, and deep sequencing**

A viral master stock was created from each culture-positive swab (27 total; see Supplemental Table 1 below), by expansion on Vero (African green monkey kidney) cells (ATCC, CCL-81). The titer of each stock was determined by limiting dilution on Vero cell monolayers under methylcellulose. To collect viral nucleocapsid DNA, each master stock was used to infect Vero cells at an MOI of 5. From this infection, DNA was isolated according to previously described methods. using Freon-based separation, proteinase K digestion, phenol-chloroform DNA extraction, and ethanol precipitation<sup>16</sup>. Viral nucleocapsid DNA was sheared on a Covaris M220 (parameters: 60-s duration, peak power of 50, 10% duty cycle, 4°C) and used to create barcoded Illumina TruSeq DNA sequencing libraries according to manufacturer's protocols. Libraries were checked by Qubit (Invitrogen, CA), Bioanalyzer (Agilent), and quantitative PCR (KAPA Biosystems), before paired-end sequencing (2 × 300 bp; v3 chemistry) on our in-house Illumina MiSeq.

### ***De novo* assembly and network graph analysis of viral genomes**

First, HSV-specific reads were selected from by BLAST-based comparison of all Illumina sequence data (FASTQ files) against a database of all HSV genes and genomes in GenBank. The resulting sequence reads were quality-controlled using our published Viral Genome Assembly (VirGA) pipeline<sup>17</sup>, which includes adaptor trimming via Trimmomatic<sup>18</sup>, and removal of low quality bases (minimum Phred score 30, over a 15 bp window size), short read fragments (minimum size 30 bp), and unpaired reads. The resulting paired-end reads were used for viral genome *de novo* assembly via MetaSpades v.3.14.0 (parameters: `spades.py -k 21, 33, 55, 77 --meta -1 $R1 -2 $R2`)<sup>19</sup>. The resulting MetaSpades contigs were compiled into full-length consensus genomes using VirGA, and annotated by comparison to the HSV1 reference genome (strain 17, GenBank JN555585)<sup>17,20</sup>. These 27 viral genomes were compared to a globally-representative set of 60 previously sequenced viral genomes<sup>3</sup> (see Supplemental Table 2 for strain names, source locations, GenBank accessions, and references). Trimmed viral genomes (excluding the terminal copies of the repeat regions) were aligned using

MAFFT v7.394 with default parameters<sup>21</sup>. Network graphs were constructed using SplitsTree v4 (version 4.14.5; uncorrected P-distance, gaps excluded)<sup>22</sup>.

## References

1. Rathbun MM, Shipley MM, Bowen CD, et al. Comparison of herpes simplex virus 1 genetic diversity between adult sexual transmission partners with genital infection. *PLOS Pathog*. Published online May 19, 2022. doi:10.1371/journal.ppat.1010437
2. Paavilainen H, Lehtinen J, Romanovskaya A, et al. Inhibition of clinical pathogenic herpes simplex virus 1 strains with enzymatically created siRNA pools. *J Med Virol*. 2016;88(12):2196-2205. doi:10.1002/jmv.24578
3. Bowen CD, Paavilainen H, Renner DW, et al. Comparison of herpes simplex virus 1 strains circulating in Finland demonstrates the uncoupling of whole-genome relatedness and phenotypic outcomes of viral infection. Longnecker RM, ed. *J Virol*. 2019;93(8):e01824-18. doi:10.1128/JVI.01824-18
4. Rastrojo A, López-Muñoz AD, Alcamí A. Genome Sequence of Herpes Simplex Virus 1 Strain SC16. *Genome Announc*. 2017;5(4):e01392-16. doi:10.1128/genomeA.01392-16
5. Pfaff F, Groth M, Sauerbrei A, Zell R. Genotyping of herpes simplex virus type 1 (HSV-1) by whole genome sequencing. *J Gen Virol*. Published online August 24, 2016. doi:10.1099/jgv.0.000589
6. Skoblov MYu, Lavrov AV, Bragin AG, et al. The genome nucleotide sequence of herpes simplex virus 1 strain L2. *Russ J Bioorganic Chem*. 2017;43(2):140-142. doi:10.1134/S1068162016060133

7. Dweikat SN, Renner DW, Bowen CD, Szpara ML. Multi-phenotype analysis for enhanced classification of 11 herpes simplex virus 1 strains. *J Gen Virol.* 2022;in press. doi:10.1099/jgv.0.001780
8. Bowen CD, Renner DW, Shreve JT, et al. Viral forensic genomics reveals the relatedness of classic herpes simplex virus strains KOS, KOS63, and KOS79. *Virology.* 2016;492:179-186. doi:10.1016/j.virol.2016.02.013
9. Lee K, Kolb AW, Sverchkov Y, Cuellar JA, Craven M, Brandt CR. Recombination Analysis of Herpes Simplex Virus 1 Reveals a Bias toward GC Content and the Inverted Repeat Regions. Longnecker RM, ed. *J Virol.* 2015;89(14):7214-7223. doi:10.1128/JVI.00880-15
10. Bondre VP, Sankararaman V, Andhare V, Tupekar M, Sapkal GN. Genetic characterization of human herpesvirus type 1: Full-length genome sequence of strain obtained from an encephalitis case from India. *Indian J Med Res.* 2016;144(5):750-760. doi:10.4103/ijmr.IJMR\_747\_14
11. Parsons LR, Tafuri YR, Shreve JT, et al. Rapid Genome Assembly and Comparison Decode Intrastrain Variation in Human Alphaherpesviruses. *mBio.* 2015;6(2):e02213-14. doi:10.1128/mBio.02213-14
12. Kolb AW, Adams M, Cabot EL, Craven M, Brandt CR. Multiplex sequencing of seven ocular herpes simplex virus type-1 genomes: phylogeny, sequence variability, and SNP distribution. *Invest Ophthalmol Vis Sci.* 2011;52(12):9061-9073. doi:10.1167/iovs.11-7812

13. Szpara ML, Gatherer D, Ochoa A, et al. Evolution and diversity in human herpes simplex virus genomes. *J Virol.* 2014;88(2):1209-1227. doi:10.1128/JVI.01987-13
14. Szpara ML, Parsons L, Enquist LW. Sequence variability in clinical and laboratory isolates of herpes simplex virus 1 reveals new mutations. *J Virol.* 2010;84(10):5303-5313. doi:10.1128/JVI.00312-10
15. Ushijima Y, Luo C, Goshima F, Yamauchi Y, Kimura H, Nishiyama Y. Determination and analysis of the DNA sequence of highly attenuated herpes simplex virus type 1 mutant HF10, a potential oncolytic virus. *Microbes Infect.* 2007;9(2):142-149. doi:10.1016/j.micinf.2006.10.019
16. Szpara ML, Tafuri YR, Enquist LW. Preparation of viral DNA from nucleocapsids. *J Vis Exp JoVE.* 2011;(54):2-7. doi:10.3791/3151
17. Parsons LR, Tafuri YR, Shreve JT, et al. Rapid genome assembly and comparison decode intrastrain variation in human alphaherpesviruses. *mBio.* 2015;6(2):e02213-14. doi:10.1128/mBio.02213-14
18. Bolger AM, Lohse M, Usadel B. Trimmomatic: a flexible trimmer for Illumina sequence data. *Bioinformatics.* 2014;30(15):2114-2120. doi:10.1093/bioinformatics/btu170
19. Bankevich A, Nurk S, Antipov D, et al. SPAdes: A New Genome Assembly Algorithm and Its Applications to Single-Cell Sequencing. *J Comput Biol.* 2012;19(5):455-477. doi:10.1089/cmb.2012.0021
20. Langmead B, Salzberg SL. Fast gapped-read alignment with Bowtie 2. *Nat Methods.* 2012;9(4):357-359. doi:10.1038/nmeth.1923



21. Katoh K, Misawa K, Kuma K ichi, Miyata T. MAFFT: a novel method for rapid multiple sequence alignment based on fast Fourier transform. *Nucleic Acids Res.* 2002;30(14):3059-3066.
22. Huson DH. SplitsTree: analyzing and visualizing evolutionary data. *Bioinformatics.* 1998;14(1):68-73. doi:10.1093/bioinformatics/14.1.68
